# Supplementary material for: Helical Microstructures of the Mineralized Coralline Red Algae Determine Their Mechanical Properties
Source: PubMed Central journal article supplement (PMC7284203; doi:10.1002/advs.202000108), 2020-04-21
Supplement: ADVS-7-2000108-s001.pdf [file ADVS-7-2000108-s001.pdf]

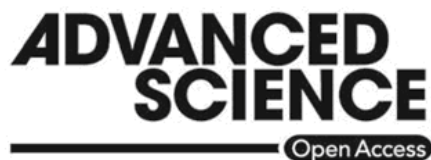

## Supporting Information

for *Adv. Sci.*, DOI: 10.1002/advs.202000108

Helical Microstructures of the Mineralized Coralline Red  
Algae Determine Their Mechanical Properties

*Nuphar Bianco-Stein, Iryna Polishchuk, Gabriel Seiden,  
Julie Villanova, Alexander Rack, Paul Zaslansky,\* and Boaz  
Pokroy\**

## Supporting Information

### Helical Microstructure of Mineralized Tissue in Coralline Red Algae Determines their Mechanical Properties

*Nuphar Bianco-Stein, Iryna Polishchuk, Gabriel Seiden, Julie Villanova, Alexander Rack, Paul Zaslansky, Boaz Pokroy\**

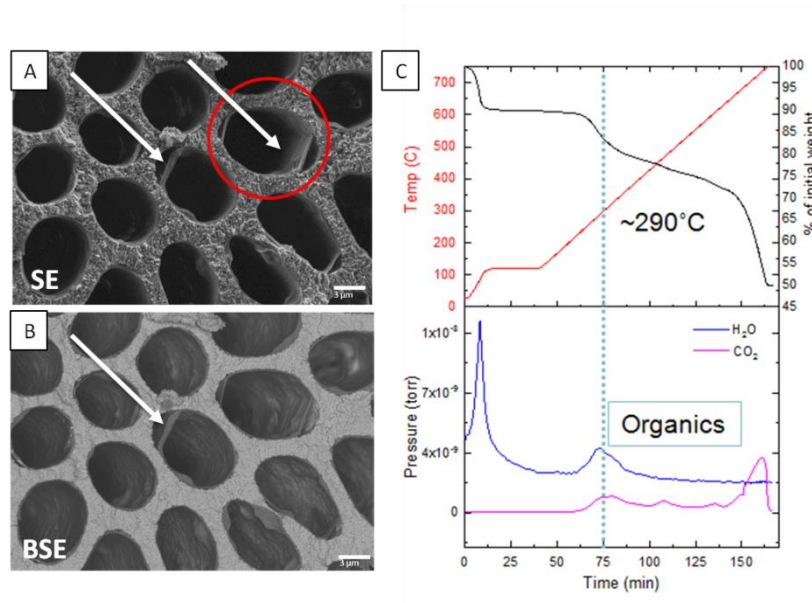

**Figure S1.** Characterization of the organic phase a) Secondary electron image of a cross section of *Jania* sp. at higher magnification. b) Back-scattered electron image of the area shown in (A), indicating the presence of at least two different phases. c) Coupled TGA-MS.

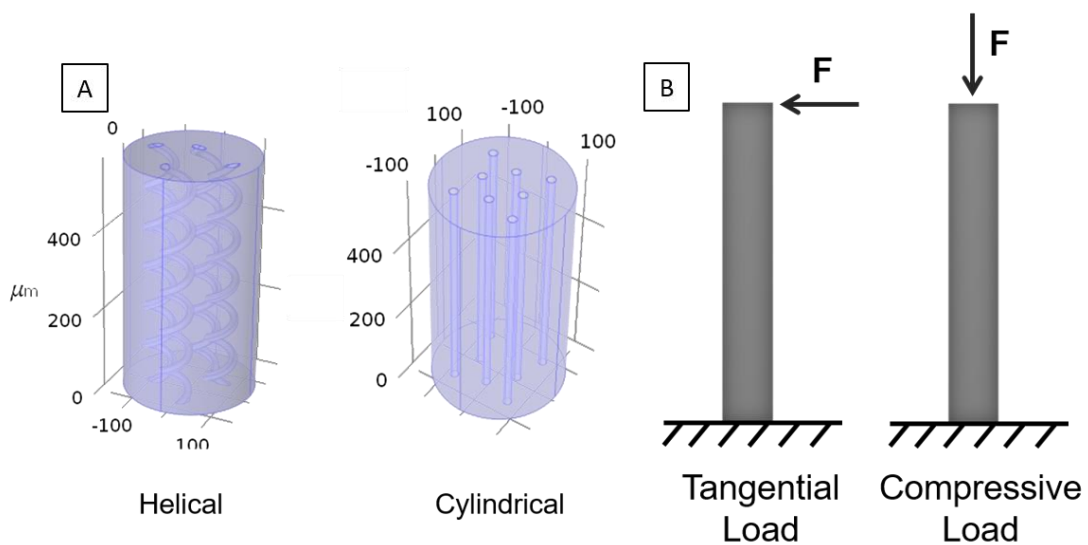

**Figure S2.** a) Models studied with finite element analysis. b) Modes of load used for the analysis.

**Movie S1.** Cross section of *Jania* sp. imaged at ID19 of the ESRF using X-ray microtomography along 75 $\mu$ m of the alga displaying its helical pores.
